# Supplementary material for: Genetic Polymorphisms and In Silico Mutagenesis Analyses of CYP2C9, CYP2D6, and CYPOR Genes in the Pakistani Population
Source: Genes (Basel). 2018 Oct 22;9(10):514. doi: 10.3390/genes9100514 (PMC6211126; doi:10.3390/genes9100514)
Supplement: Supplementary file 1 [file genes-09-00514-s001.xlsx]

## Sheet: Table S1
	Table S1. Demographics of the subjects included in present study
	Demographic factors		KPK	PUN	SIN	BAL	GLB	AZK
	Male		52	49	19	4	12	7
	Female		33	31	9	9	8	11
	aAge (Years)		85	80	28	13	20	18
		Male	33.8±8.34	29.7±5.1	31.3± 6.84	42±9.2	31.8±9.09	28±2.7
		Female	27.5±2.77	23.3±4.46	25.3± 5.89	30.7±5.7	30.7±4.8	26.7±5.9
	bWeight (Kg)
		Male	80.30±11.15	74.7±13.6	76.2±13.6	71.5±11.6	72.6±6.62	62.7±5.9
		Female	53.4±7.54	47.14±6.77	51.3±4.51	52.9±8.59	49.9±9.58	48.75± 6.4
	Smoking Status
		Male	19	10	4	1	1	2
		Female	0	0	0	0	0	0
	Drinking Status
		Male	1	2	2	1	0	0
		Female	0	0	0	0	0	0
	Marital status
		Married	55	26	17	10	16	5
		Single	30	54	11	3	4	13
	Residence Area
		Urban	53	51	17	9	17	11
		Rural	31	28	11	6	3	7
	KPK: Khyber Pakhtunkhwa; PUN: Punjab; SIN: Sindh; BAL: Balochistan; GLB : Gilgit-Baltistan; AZK: Azad Kashmir; a.b Information is expressed as average ± standard deviation.

## Sheet: Table S2
	Table S2. Primers used for CYP2C9, CYP2D6 and CYPOR SNPs amplification and sequencing
	Gene	SNP ID	Forward primer (5′–3′)	Reverse primer (5′–3′)	PCR product size (bp)
	Cyp2C9	rs1799853	CCCAGTGTCAGCTTCCTCTT	ATACCCACACTGTACGCACA	426
		rs1057910	TGCACGAGGTCCAGAGGTAC	ACAAACTTACCTTGGGAATGAGA	512
		rs72558189	GAGATCCGGCATTTCTCCCTCAT	CGTCATGAGGGAGAAATGCCGG	474
	Cyp2D6	rs16947	TTCGATGTCACGGGATGTCA	CCCGTTCTGTCCCGAGTATG	550
		rs1135840	TCACCAACCTGTCATCGGTG	TACCCCTGTCTCAAATGCGG	589
		rs566383351	GCAGGTTCACTCACAGCAGA	GCCATGTATAAATGCCCTTCTCC	499
		rs530422334	TGAGTTCCTCCATCACAGAAGG	TAGTGCAGGTGGTTTCTTGGC	500
		rs35023634	CAAGGTGGATGCACAAAGAGT	TGTCCTTTCCCAAACCCATCT	663
		rs35481113	AAGGGTGCTGAAGGTCACTC	CCAAACCTGCTTCCCCTTCT	790
		rs543939200	GACTTGGTGAGGTCAGTGGTAA	TGTCCCAGCAAAGTTCATGG	712
		rs372204775	GCCAAGGAAGAGTAGGGCAA	TGTTTCATGTCCACGACCCC	797
		rs267608272	CTAGGGAGGTGTGAGCATGG	TCCTCCTTCAGTCCCTCCTG	792
		rs28371725	CCAACATAGGAGGCAAGAAGGA	TTCAGCACCGATGACAGGTT	759
		rs28371738	ACTCTCACCCTGCATCTCCT	TGACACCTCTAGTCAGCCCA	773
		rs374672076	ACGCATCCAAACTGAGTTCCT	CTGGCCTGTTTCATGTCCAC	503
		rs17002852	GTTCTACGGCTCCCAGATGGG	GCAGTCCCCATCTGGGAGCCGTA	560
		rs34167214	GACGGGGACTGCAGGGGAGTT	GGTTGGCAAACTCCCCTGCAG	551
		rs35046171	GAGACCCCACCGAGAATGCCC	AGTCCTGGGCATTCTCGGTGGG	533
	CYPOR	rs1057868	CCACCGACAATGCCCGGGAC	CAGTCGTAGAAGTCCCGGGCA	533
		rs1057870	TTGGTCTTGGGAACAAGGCCTAC	ATTGAAGTGCTCGTAGGCCTTGT	697
		rs781919285	GGTTGGGCGACGACAATGGGA	CTCCAAGTTCCCATTGTCGTC	697
		rs562750402	CAGTGACCATTTCCTGCAG	ACGGGACAAAGCTGGAATGT	558
		rs71526806	CAGTGACCATTTCCTGCAG	CGGGAGAAGCTTCGTGAGTT	628
		rs4732514	TTATGTCAGCCCCAGTCCAA	ACCCAAGAGTCACCCCAAAA	512
		rs4732515	GCTTTACTGTAGGGGAAATGGGA	TTCAAGGAAACAAACTGTCCCA	499
		rs4732516	TTTTGCTTTTCGGCTTGCCC	ATGTGTCCTTGTCGAGAGGT	497
		rs2228104	CCCCTGCTTCTTGTCGTATGTA	GTGCAGAGTAAGGTGGCTAAGT	450
		rs2302433	CCCTCACCTACTACCTGGACAT	TCAGATCTCGGAGCTCCTGT	476
		rs1135612	CTCTGAGGTTTGGGTGCCA	CCGTAGTACAGCAGCGTCT	511
		rs13223707	ATAGGCTTCATCCAGGAGCG	TGGCCATGTTCCGTGCAT	547
		rs13240147	ATCTACGTCTGTGGGTGAGTGA	AGCAGAGAGAAAGAGCCCTT	537
		rs41301394	GTGTAGTGTGCGGTGAAAGC	GTGAGATGGGGCTGATTGGG	550
		rs10239977	AGGGACTCAAAGCCAGGAAG	GGTGGGTTTGGTTTGGGAGA	550
		rs533975609	GATCCCACGACACTCAGACA	AGCCAGACCTTTCTTGCCTT	532
		rs72554000	CCCCAGCACTACGAGAATGT	AAAAGCAAAACTGGCAGGGG	696
		rs369026313	TTTGTGCAACCAGAAGCGTC	TGGGATCCTGTAACCGTGGA	570

## Sheet: Table S3
	Table S3. Distribution of Cyp2C9, Cyp2D6 and CYPOR variants in Pakistani population and global populations from 1000 Genomes Project Database.
	#	Gene/SNP ID	Geno-type	Allele	PAK		ASW		LWK		YRI		MXL		CHB		CHS		JPT		CEU		TSI		GIH		STU		P/q -values
					n	Fr.	n	Fr.	n	Fr.	n	Fr.	n	Fr.	n	Fr.	n	Fr.	n	Fr.	n	Fr.	n	Fr.	n	Fr.	n	Fr.
	1	CYP2C9	CC		235	0.98	56	0.92	99	1	108	1	51	0.8	103	1	105	0.99	104	1	73	0.74	77	0.72	94	0.91	96	0.94
		rs1799853	CT		5	0.02	5	0.08	0	0	0	0	13	0.2	0	0	1	0.01	0	0	22	0.22	27	0.25	8	0.08	6	0.06
			TT		0	0	0	0	0	0	0	0	0	0	0	0	0	0	0	0	4	0.04	3	0.03	1	0.01	0	0
				C	475	0.99	117	0.96	198	1	216	1	115	0.9	206	1	209	1	208	1	168	0.85	181	0.85	196	0.95	198	0.97
				T	5	0.01	5	0.04	0	0	0	0	13	0.1	0	0	1	0.01	0	0	30	0.15	33	0.15	10	0.05	6	0.03
								_		_		_		_		_		_		_		< 0.0001		< 0.0001		0.0122		_	P (G)
								0.0333		0.3287		0.3313		3.079e-06		0.3294		0.6731		0.3297		1.327e-12		2.356e-13		0.0033		0.0942	P (A)
								0.0478989		0.305963		0.306037		7.56e-06		0.305963		0.562434		0.305963		8.91e-12		1.69e-12		0.00572882		0.112915	q-value
	2	CYP2C9	AA		202	0.83	59	0.97	99	1	108	1	61	0.95	95	92	96	0.91	100	0.96	86	0.87	90	0.84	77	0.75	82	0.8
		rs1057910	AC		37	0.15	2	0.03	0	0	0	0	3	0.05	8	0.08	8	0.08	4	0.04	13	0.13	16	0.15	25	0.24	20	0.2
			CC		4	0.02	0	0	0	0	0	0	0	0	0	0	1	0.01	0	0	0	0	1	0.01	1	0.01	0	0
				A	441	0.91	120	0.98	198	1	216	1	125	0.95	198	0.96	200	0.95	204	0.98	185	0.93	196	0.92	179	0.87	184	0.9
				C	45	0.09	2	0.02	0	0	0		3	0.02	8	0.04	10	0.05	4	0.02	13	0.07	18	0.08	27	0.13	20	0.1
								_		< 0.0001		< 0.0001		_		0.0643		0.1277		0.0039		0.3757		0.8713		0.1249		0.2754	P (G)
								0.0036		1.73e-07		4.322e-08		0.0085		0.0181		0.0467		0.0003		0.2912		0.7759		0.1356		0.8865	P (A)
								0.00609207		4.91e-07		1.43e-07		0.0135849		0.027613		0.0602839		0.000575362		0.281253		0.627503		0.143719		0.689268	q-value
	3	CYP2C9	GG		229	0.94	61	1	99	1	108	1	64	1	103	1	105	1	104	1	99	1	107	1	99	0.96	97	0.95
		rs72558189	AG		8	0.03	0	0	0	0	0	0	0	0	0	0	0	0	0	0	0	0	0	0	4	0.04	5	0.05
			AA		6	0.02	0	0	0	0	0	0	0	0	0	0	0	0	0	0	0	0	0	0	0	0	0	0
				G	466	0.96	122	1	198	1	216	1	128	1	206	1	210	1	208	1	198	1	214	1	202	0.98	199	0.98
				A	20	0.04	0	0	0	0	0	0	0	0	0	0	0	0	0	0	0	0	0	0	4	0.02	5	0.03
								0.1585		0.0511		0.0391		0.1449		0.0454		0.0428		0.0441		0.0511		0.0403		0.2667		0.2211	P (G)
								0.0195		0.0017		0.0009		0.0116		0.0009		0.0009		0.0009		0.0017		0.0009		0.1786		0.3741	P (A)
								0.0238333		0.00267143		0.00198		0.01595		0.00198		0.00198		0.00198		0.00267143		0.00198		0.19646		0.3741	q-value
	4	CYP2D6	GG		90	0.37	20	0.33	10	0.1	26	0.24	38	0.59	70	0.68	81	0.77	79	0.76	51	0.52	43	0.4	34	0.33	43	0.42
		rs16947	AG		118	0.49	31	0.51	50	0.51	43	0.4	19	0.3	32	0.31	20	0.19	21	0.2	32	0.32	48	0.45	47	0.46	41	0.4
			AA		33	0.14	10	0.16	39	0.39	39	0.36	7	0.11	1	0.01	4	0.04	4	0.04	16	0.16	16	0.15	22	0.21	18	0.18
				G	298	0.62	71	0.58	70	0.35	95	0.44	95	0.74	172	0.84	182	0.87	179	0.86	134	0.68	134	0.63	115	0.56	127	0.62
				A	184	0.38	51	0.42	128	0.65	121	0.56	33	0.26	34	0.17	34	0.17	29	0.14	64	0.32	80	0.37	91	0.44	77	0.38
								0.7554		< 0.0001		< 0.0001		0.0057		< 0.0001		< 0.0001		< 0.0001		0.0174		0.7781		0.2023		0.3058	P (G)
								0.4686		4.422e-10		1.647e-05		0.0094		8.218e-09		1.293e-09		5.878e-11		0.1611		0.8659		0.1491		0.9317	P (A)
								0.415705		1.94e-09		3.69e-05		0.0147886		2.96e-08		5.31e-09		2.75e-10		0.167433		0.678359		0.1572		0.70801	q-value
	5	CYP2D6	CC		72	0.3	12	0.2	7	0.07	16	0.15	26	0.41	9	0.09	9	0.09	27	0.26	22	0.22	24	0.22	18	0.18	29	0.28
		rs1135840	GC		167	0.7	28	0.46	36	0.36	38	0.35	25	0.39	32	0.31	36	0.34	50	0.48	42	0.42	42	0.39	48	0.48	37	0.36
			GG		1	0	21	0.34	56	0.57	54	0.5	13	0.2	62	0.6	60	0.57	27	0.26	35	0.35	41	0.38	37	0.36	36	0.35
				C	311	0.65	52	0.43	50	0.25	70	0.32	77	0.6	50	0.24	54	0.26	104	0.5	86	0.43	90	0.42	84	0.41	95	0.47
				G	169	0.35	70	0.57	148	0.75	146	0.68	51	0.4	156	0.76	156	0.74	104	0.5	112	0.57	124	0.58	122	0.59	109	0.53
								< 0.0001		< 0.0001		< 0.0001		< 0.0001		< 0.0001		< 0.0001		< 0.0001		< 0.0001		< 0.0001		< 0.0001		< 0.0001	P (G)
								1.168e-05		2.2e-16		2.369e-15		0.3522		2.2e-16		2.2e-16		0.0004		3.768e-07		3.267e-08		7.933e-09		1.318e-05	P (A)
								2.7e-05		1.93e-15		1.99e-14		0.322386		1.93e-15		1.93e-15		0.00075281		1.03e-06		1.1e-07		2.9e-08		3.02e-05	q-value
	6	CYP2D6	AA		0	0	0	0	0	0	0	0	0	0	0	0	0	0	0	0	0	0	0	0	0	0	0	0
		rs566383351	AG		68	0.28	0	0	0	0	0	0	0	0	0	0	0	0	0	0	0	0	0	0	0	0	0	0
			GG		172	0.72	61	1	99	1	108	1	64	1	103	1	105	1	104	1	99	1	107	1	103	1	102	1
				A	68	0.14	0	0	0	0	0	0	0	0	0	0	0	0	0	0	0	0	0	0	0	0	0	0
				G	412	0.86	122	1	198	1	216	1	128	1	206	1	210	1	208	1	198	1	214	1	214	1	204	1
								_		_		_		_		_		_		_		_		_		_		_	P (G)
								9.179e-08		1.812e-11		3.748e-12		4.852e-08		8.321e-12		8.181e-12		8.005e-12		1.812e-11		3.823e-12		3.823e-12		9.113e-12	P (A)
								2.89e-07		8.9e-11		2.26e-11		1.58e-07		4.53e-11		4.53e-11		4.53e-11		8.9e-11		2.26e-11		2.26e-11		4.71e-11	q-value
	7	CYP2D6	TT		233	0.97	61	1	99	1	108	1	64	1	103	1	105	1	104	1	99	1	107	1	103	1	102	1
		rs530422334	CT		6	0.02	0	0	0	0	0	0	0	0	0	0	0	0	0	0	0	0	0	0	0	0	0	0
			CC		2	0.01	0	0	0	0	0	0	0	0	0	0	0	0	0	0	0	0	0	0	0	0	0	0
				T	472	0.98	122	1	198	1	216	1	128	1	206	1	210	1	208	1	198	1	214	1	206	1	204	1
				C	10	0.02	0	0	0	0	0	0	0	0	0	0	0	0	0	0	0	0	0	0	0	0	0	0
								_		_		_		_		_		_		_		_		_		_		_	P (G)
								0.2254		0.0396		0.0361		0.1314		0.0377		0.0369		0.0373		0.0396		0.0364		0.0377		0.0381	P (A)
								0.226952		0.0525964		0.0515582		0.140857		0.0519993		0.0519637		0.0519993		0.0525964		0.0516205		0.0519993		0.0521936	q
	8	CYP2D6	GG		0	0	0	0	0	0	0	0	0	0	0	0	0	0	0	0	0	0	0	0	0	0	0	0
		rs35023634	CG		2	1	0	0	0	0	0	0	0	0	0	0	0	0	2	0.02	0	0	0	0	0	0	0	0
			CC		241	0	61	1	99	1	108	1	64	1	103	1	105	1	102	0.98	99	1	107	1	103	1	102	1
				G	2	0	0	0	0	0	0	0	0	0	0	0	0	0	2	0.01	0	0	0	0	0	0	0	0
				C	484	1	122	1	198	1	216	1	128	1	206	1	210	1	206	0.99	198	1	214	1	206	1	204	1
								_		_		_		_		_		_		_		_		_		_		_	P (G)
								1		1		1		1		1		1		0.5873		1		1		1		1	P (A)
								0.724377		0.724377		0.724377		0.724377		0.724377		0.724377		0.506076		0.724377		0.724377		0.724377		0.724377	q-value
	9	CYP2D6	CC		0	0	0	0	0	0	0	0	0	0	0	0	0	0	0	0	0	0	0	0	0	0	0	0
		rs35481113	CT		8	0.03	0	0	0	0	0	0	0	0	0	0	0	0	2	0.02	0	0	0	0	0	0	0	0
			TT		232	0.97	61	1	99	1	108	1	64	1	103	1	105	1	102	0.98	99	1	107	1	103	1	102	1
				C	8	0.02	0	0	0	0	0	0	0	0	0	0	0	0	2	0.01	0	0	0	0	0	0	0	0
				T	472	0.98	122	1	198	1	216	1	128	1	206	1	210	1	206	0.99	198	1	214	1	206	1	204	1
								_		_		_		_		_		_		_		_		_		_		_	P (G)
								0.3693		0.113		0.0633		0.2142		0.1136		0.1142		0.7313		0.113		0.115		0.1136		0.1133	P (A)
								0.333852		0.127244		0.0786975		0.216758		0.127244		0.127244		0.598646		0.127244		0.127244		0.127244		0.127244	q
	10	CYP2D6	GG		242	1	61	1	99	1	108	1	64	1	103	1	105	1	104	1	99	1	107	1	103	1	102	1
		rs543939200	AG		0	0	0	0	0	0	0	0	0	0	0	0	0	0	0	0	0	0	0	0	0	0	0	0
			AA		0	0	0	0	0	0	0	0	0	0	0	0	0	0	0	0	0	0	0	0	0	0	0	0
				G	484	1	122	1	198	1	208	1	128	1	206	1	210	1	208	1	198	1	214	1	206	1	204	1
				A	0	0	0	0	0	0	0	0	0	0	0	0	0	0	0	0	0	0	0	0	0	0	0	0
								_		_		_		_		_		_		_		_		_		_		_	P (G)
								_		_		_		_		_		_		_		_		_		_		_	P (A)
	11	CYP2D6	CC		208	0.87	61	1	99	1	108	1	64	1	103	1	104	0.99	104	1	98	0.99	106	0.99	96	0.93	97	0.95
		rs372204775	CT		19	0.08	0	0	0	0	0	0	0	0	0	0	1	0.01	0	0	1	0.01	1	0.01	6	0.06	5	0.05
			TT		12	0.05	0	0	0	0	0	0	0	0	0	0	0	0	0	0	0	0	0	0	1	0.01	0	0
				C	435	0.91	122	1	198	1	216	1	128	1	206	1	209	1	208	1	197	1	213	1	198	0.96	199	0.98
				T	43	0.09	0	0	0	0	0	0	0	0	0	0	1	0.01	0	0	1	0.01	1	0.01	8	0.04	9	0.03
								0.0121		0.0009		0.0005		0.0098		0.0006		0.0006		0.0006		0.0028		0.0016		0.1452		0.0372	P (G)
								5.023e-05		2.822e-07		7.214e-08		4.845e-05		1.453e-07		9.644e-07		1.386e-07		3.756e-06		1.827e-06		0.0177		0.0404	P (A)
								0.000103216		7.78e-07		2.31e-07		0.000101394		4.24e-07		2.46e-06		4.1e-07		9.11e-06		4.6e-06		0.0274182		0.0528287	q-value
	12	CYP2D6	TT		243	1	61	1	99	1	108	1	64	1	102	0.99	104	0.99	103	0.99	99	1	107	1	103	1	102	1
		rs267608272	CT		0	0	0	0	0	0	0	0	0	0	1	0.01	1	0.01	1	0.01	0	0	0	0	0	0	0	0
			CC		0	0	0	0	0	0	0	0	0	0	0	0	0	0	0	0	0	0	0	0	0	0	0	0
				T	446	1	122	1	198	1	216	1	128	1	205	1	209	1	207	1	198	1	214	1	206	1	204	1
				C	0	0	0	0	0	0	0	0	0	0	1	0.01	1	0.01	1	0.01	0	0	0	0	0	0	0	0
								_		_		_		_		_		_		_		_		_		_		_	P (G)
								_		_		_		_		0.316		0.3201		0.318		_		_		_		_	P (A)
								_		_		_		_		0.300647		0.301218		0.300647		_		_		_		_	q-value
	13	CYP2D6	CC		167	0.7	59	0.97	93	0.94	106	0.98	62	0.97	96	0.93	95	0.91	103	0.99	77	0.78	77	0.72	78	0.76	79	0.78
		rs28371725	CT		52	0.22	2	0.03	6	0.06	2	0.02	2	0.03	7	0.07	10	0.1	1	0.01	20	0.2	29	0.27	20	0.19	22	0.22
			TT		21	0.09	0	0	0	0	0	0	0	0	0	0	0	0	0	0	2	0.02	1	0.01	5	0.05	1	1.01
				C	386	0.8	120	0.98	192	0.97	214	0.99	126	0.98	199	0.97	200	0.95	207	1	174	0.88	183	0.86	176	0.85	180	0.88
				T	94	0.2	2	0.02	6	0.03	2	0.01	2	0.02	7	0.03	7	0.05	1	0.01	24	0.12	31	0.15	30	0.15	2	0.12
								< 0.0001		< 0.0001		< 0.0001		< 0.0001		< 0.0001		< 0.0001		< 0.0001		0.0671		0.0172		0.3683		0.0256	P (G)
								2.615e-08		1.022e-09		2.454e-14		1.448e-08		1.829e-09		1.744e-09		3.673e-15		0.0195		0.1101		0.1301		3.043e-12	P (A)
								8.87e-08		4.2e-09		1.94e-13		4.86e-08		7.11e-09		6.85e-09		2.98e-14		0.0293048		0.127244		0.140855		1.97e-11	q-value
	14	CYP2D6	GG		195	0.81	45	0.74	92	0.93	87	0.81	46	0.72	18	0.18	23	0.22	42	0.4	56	0.57	68	0.64	74	0.72	75	0.74
		rs28371738	AG		44	0.18	13	0.21	7	0.07	19	0.18	17	0.27	51	0.5	37	0.35	44	0.42	38	0.38	34	0.32	27	0.26	23	0.23
			AA		3	0.01	3	0.05	0	0	2	0.02	1	0.02	34	0.33	45	0.43	18	0.17	5	0.05	5	0.05	2	0.02	4	0.04
				G	434	0.9	103	0.84	191	0.097	193	0.89	109	0.85	87	0.42	83	0.4	128	0.62	150	0.76	170	0.79	175	0.85	173	0.85
				A	50	0.1	19	0.16	7	0.04	23	0.11	19	0.15	119	0.58	127	0.61	80	0.39	48	0.24	44	0.21	31	0.15	31	0.15
								0.1446		_		0.9002		_		< 0.0001		< 0.0001		< 0.0001		< 0.0001		0.0017		0.2002		0.1578	P (G)
								0.1115		0.0034		0.8941		0.1585		2.2e-16		2.2e-16		2.2e-16		6.54e-06		0.0004		0.0925		0.0915	P (A)
								0.127244		0.00580238		0.692504		0.166241		1.93e-15		1.93e-15		1.93e-15		1.56e-05		0.00075281		0.111541		0.111	q-value
	15	CYPOR	CC		105	0.43	36	0.59	71	0.72	83	0.77	33	0.52	44	0.43	36	0.34	39	0.38	47	0.48	49	0.46	44	0.43	43	0.42
		rs1057868	CT		118	0.49	22	0.36	28	0.28	24	0.22	37	0.45	48	0.47	55	0.52	46	0.44	44	0.44	49	0.46	47	0.46	51	0.5
			TT		20	0.08	3	0.05	0	0	1	0.01	2	0.03	11	0.11	14	0.13	19	0.18	8	0.08	9	0.08	12	0.12	8	0.08
				C	328	0.67	94	0.77	170	0.86	190	0.88	95	0.74	136	0.66	127	0.61	124	0.6	138	0.7	147	0.69	135	0.66	137	0.67
				T	158	0.33	28	0.23	28	0.14	26	0.12	33	0.26	70	0.34	83	0.4	84	0.4	60	0.3	67	0.31	71	0.35	67	0.33
								0.0826		< 0.0001		< 0.0001		0.2805		0.761		0.1644		0.0248		0.7629		0.8892		0.59198		0.9693	P (G)
								0.0476		4.321e-07		3.238e-09		0.1632		0.724		0.0827		0.0556		0.5886		0.7925		0.6588		0.9293	P (A)
								0.0610544		1.16e-06		1.25e-08		0.167985		0.598646		0.100932		0.0708642		0.506076		0.635821		0.552779		0.70801	q-value
	16	CYPOR	GG		116	0.48	51	0.84	77	0.78	79	0.73	43	0.67	96	0.93	101	0.96	93	0.89	45	0.46	53	0.5	51	0.5	50	0.49
		rs1057870	AG		114	0.47	9	0.15	22	0.22	27	0.25	21	0.33	7	0.07	4	0.04	11	0.11	46	0.47	48	0.45	42	0.41	41	0.4
			AA		12	0.05	1	0.02	0	0	2	0.02	0	0	0	0	0	0	0	0	8	0.08	6	0.06	10	0.1	11	0.11
				G	346	0.71	111	0.91	176	0.98	185	0.86	107	0.84	199	0.97	206	0.98	197	0.95	136	0.69	154	0.72	144	0.69	141	0.69
				A	138	0.29	11	0.09	22	0.11	31	0.14	21	0.16	7	0.03	4	0.02	11	0.05	62	0.31	60	0.28	62	0.3	63	0.31
								< 0.0001		< 0.0001		< 0.0001		0.0104		< 0.0001		< 0.0001		< 0.0001		0.5312		0.9137		0.1985		0.1097	P (G)
								1.979e-06		4.888e-07		3.669e-05		0.0063		2.2e-16		2.2e-16		1.8e-13		0.4605		0.9276		0.714		0.5819	P (A)
								4.97e-06		1.3e-06		7.93e-05		0.0102312		1.93e-15		1.93e-15		1.34e-12		0.410327		0.70801		0.594145		0.505091	q-value
	17	CYPOR	CC		211	0.87	20	0.33	36	0.36	34	0.32	48	0.75	70	0.68	78	0.74	75	0.72	90	0.91	99	0.93	91	0.88	87	0.85
		rs2228104	CT		28	0.12	32	0.53	46	0.47	44	0.41	14	0.22	33	0.32	26	0.25	26	0.25	9	0.09	8	0.08	11	0.11	14	0.14
			TT		3	0.01	9	0.15	17	0.17	30	0.28	2	0.03	0	0	1	0.01	3	0.03	0	0	0	0	1	0.01	1	0.01
				C	450	0.93	72	0.59	118	0.6	112	0.52	110	0.86	173	0.84	182	0.87	176	0.85	189	0.96	206	0.96	193	0.94	188	0.92
				T	34	0.07	50	0.41	80	0.4	104	0.48	18	0.14	33	0.16	28	0.13	32	0.15	9	0.05	8	0.04	13	0.06	16	0.08
								< 0.0001		< 0.0001		< 0.0001		0.0522		_		0.0078		0.0031		_		_		0.948		0.8419	P (G)
								2.2e-16		2.2e-16		2.2e-16		0.019		0.0006		0.0092		0.001		0.2975		0.1193		0.8691		0.7482	P (A)
								1.93e-15		1.93e-15		1.93e-15		0.0287681		0.00111876		0.0145879		0.0018307		0.285284		0.130567		0.678359		0.607541	q-value
	18	CYPOR	AA		154	0.64	55	0.9	88	0.89	99	0.92	19	0.3	24	0.23	24	0.23	33	0.32	51	0.52	60	0.56	74	0.72	60	0.59
		rs1135612	GA		63	0.26	6	0.1	11	0.11	9	0.08	31	0.48	61	0.59	62	0.59	52	0.5	42	0.42	40	0.37	27	0.26	37	0.36
			GG		24	0.1	0	0	0	0	0	0	14	0.22	18	0.18	19	0.18	19	0.18	6	0.06	7	0.07	2	0.02	5	0.05
				A	371	0.77	116	0.95	187	0.94	207	0.96	69	0.54	109	0.53	110	0.52	118	0.57	144	0.73	160	0.75	175	0.85	157	0.77
				G	111	0.23	6	0.05	11	0.06	9	0.04	59	0.46	97	0.47	100	0.48	90	0.43	54	0.27	54	0.25	31	0.15	47	0.23
								0.0002		< 0.0001		< 0.0001		< 0.0001		< 0.0001		< 0.0001		< 0.0001		< 0.0001		< 0.0001		< 0.0001		< 0.0001	P (G)
								7.354e-07		9.984e-09		2.69e-11		7.398e-07		8.257e-10		3.542e-10		1.579		0.2394		0.5625		0.0181		1	P (A)
								1.91e-06		3.53e-08		1.29e-10		1.91e-06		3.56e-09		1.57e-09		4.6e-07		0.238661		0.490365		0.027613		0.724377	q-value
	19	CYPOR	CC		48	0.2	26	0.43	40	0.4	48	0.44	10	0.16	23	0.22	26	0.25	36	0.35	12	0.12	15	0.14	24	0.23	23	0.23
		rs4732514	CT		109	0.45	28	0.46	53	0.54	48	0.44	33	0.52	61	0.59	62	0.59	48	0.46	50	0.51	52	0.49	55	0.53	47	0.46
			TT		83	0.35	7	0.12	6	0.06	12	0.11	21	0.33	19	0.18	17	0.16	20	0.19	37	0.37	40	0.37	24	0.23	32	0.31
				C	205	0.43	80	0.66	133	0.67	144	0.67	53	0.41	107	0.52	114	0.54	120	0.58	74	0.37	82	0.38	103	0.5	93	0.46
				T	275	0.57	42	0.34	65	0.33	72	0.33	75	0.59	99	0.48	96	0.46	88	0.42	124	0.63	132	0.62	103	0.5	111	0.54
								< 0.0001		< 0.0001		< 0.0001		0.6182		0.0097		0.0024		0.0024		0.2232		0.41		0.1179		0.7984	P (G)
								6.952e-06		7.347e-09		4.93e-09		0.8407		0.0296		0.0061		0.0003		0.2295		0.3166		0.0796		0.501	P (A)
								1.65e-05		2.74e-08		1.87e-08		0.671815		0.0428831		0.0100688		0.000575362		0.22993		0.300647		0.0977414		0.441094	q-value
	20	CYPOR	CC		210	0.89	19	0.31	22	0.22	27	0.25	47	0.73	68	0.66	78	0.74	74	0.71	88	0.89	97	0.91	89	0.86	86	0.84
		rs4732515	CT		25	0.11	32	0.53	55	0.56	47	0.44	15	0.23	35	0.34	26	0.25	27	0.26	11	0.11	10	0.09	13	0.13	14	0.14
			TT		2	0.01	10	0.16	22	0.22	34	0.32	2	0.03	0	0	1	0.01	3	0.03	0	0	0	0	1	0.01	2	0.02
				C	445	0.094	70	0.57	99	0.5	101	0.47	109	0.85	171	0.83	182	0.87	175	0.84	187	0.94	204	0.95	191	0.93	186	0.91
				T	29	0.06	52	0.43	99	0.5	115	0.53	19	0.18	35	0.17	28	0.13	33	0.16	11	0.06	10	0.05	15	0.07	18	0.09
								< 0.0001		< 0.0001		< 0.0001		_		_		_		0.0003		_		_		_		0.4653	P (G)
								2.2e-16		2.2e-16		2.2e-16		0.0027		2.275e-05		0.0025		0.0001245		0.8595		0.5933		0.6115		0.2478	P (A)
								1.93e-15		1.93e-15		1.93e-15		0.00478358		4.98e-05		0.00450041		0.000250714		0.6765		0.506076		0.517403		0.245819	q-value
	21	CYPOR	CC		6	0.02	10	0.16	22	0.22	34	0.32	2	0.03	0	0	1	0.01	3	0.03	0	0	0	0	1	0.01	2	0.02
		rs4732516	CG		17	0.07	32	0.53	55	0.66	47	0.44	15	0.23	35	0.34	26	0.25	27	0.26	11	0.11	10	0.09	13	0.13	14	0.14
			GG		219	0.91	19	0.31	22	0.22	27	0.25	47	0.73	68	0.66	78	0.74	74	0.71	88	0.89	97	0.91	89	0.86	86	0.84
				C	29	0.06	52	0.43	99	0.5	115	0.53	19	0.15	35	0.17	28	0.13	33	0.16	11	0.06	10	0.05	15	0.07	18	0.09
				G	455	0.94	70	0.57	99	0.5	101	0.47	109	0.85	171	0.83	182	0.87	175	0.84	187	0.94	204	0.95	191	0.93	186	0.91
								< 0.0001		< 0.0001		< 0.0001		<0.0006		< 0.0001		< 0.0001		< 0.0001		0.142		0.205		0.1697		0.1376	P (G)
								2.2e-16		2.2e-16		2.2e-16		0.002708		2.275e-05		0.002503		0.0001245		1		0.5929		0.5016		0.1876	P (A)
								1.93e-15		1.93e-15		1.93e-15		0.00478358		4.98e-05		0.00450041		0.000250714		0.724377		0.506076		0.441094		0.191768	q-value
	22	CYPOR	CC		233	0.97	57	0.93	94	0.95	108	1	64	1	82	0.8	95	0.91	82	0.79	98	0.99	107	1	102	0.99	100	0.98
		rs2302433	CT		8	0.03	4	0.07	5	0.05	0	0	0	0	19	0.18	9	0.09	20	0.19	1	0.01	0	0	1	0.01	2	0.02
			TT		0	0	0	0	0	0	0	0	0	0	2	0.02	1	0.01	2	0.02	0	0	0	0	0	0	0	0
				C	474	0.98	118	0.97	193	0.96	216	1	216	1	183	0.89	199	0.95	184	89	197	1	214	1	205	1	202	0.99
				T	8	0.02	4	0.03	5	0.03	0	0	0	0	23	0.11	11	0.12	24	0.12	1	0.01	0	0	1	0.01	2	0.01
								_		_		_		_		_		_		_		_		_		_		_	P (G)
								0.2738		0.5381		0.0636		0.0636		2.466e-07		0.0115		1.06e-07		0.4596		0.1148		0.2919		0.7312	P (A)
								0.267655		0.471134		0.0786975		0.0786975		6.99e-07		0.0179522		3.36e-07		0.410327		0.127244		0.281253		0.598646	q-value
	23	CYPOR	GG		214	0.89	19	0.31	23	0.23	27	0.25	47	0.73	67	0.56	77	0.73	74	0.71	88	0.89	97	0.91	89	0.86	86	0.84
		rs13223707	CG		24	0.1	32	0.53	54	0.55	47	0.44	15	0.23	35	0.34	27	0.26	27	0.26	11	0.11	10	0.09	13	0.13	14	0.14
			CC		3	0.01	10	0.16	22	0.22	34	0.32	2	0.03	1	0.01	1	0.01	3	0.03	0	0	0	0	1	0.01	2	0.02
				G	452	94	70	0.57	100	0.51	101	0.47	109	0.85	169	0.82	169	0.86	175	0.84	187	0.94	187	0.94	191	0.93	186	0.91
				C	30	0.06	52	0.43	98	0.5	115	0.53	19	0.15	37	0.18	29	0.14	33	0.16	11	0.06	11	0.06	15	0.07	18	0.09
								< 0.0001		< 0.0001		< 0.0001		0.0079		< 0.0001		0.007		0.003		_		_		0.7524		0.5131	P (G)
								2.2e-16		2.2e-16		2.2e-16		0.0029		7.951e-06		0.0008		0.0001359		0.8599		0.8599		0.86		0.2517	P (A)
								1.93e-15		1.93e-15		1.93e-15		0.0050782		1.87e-05		0.00147799		0.000270961		0.6765		0.6765		0.6765		0.248463	q-value
	24	CYPOR	GG		3	0.01	10	0.16	22	0.22	34	0.32	2	0.03	1	0.01	1	0.01	3	0.03	0	0	0	0	1	0.01	2	0.02
		rs13240147	GA		26	0.11	32	0.53	54	0.55	47	0.44	15	0.23	35	0.34	27	0.26	27	0.26	11	0.11	10	0.09	13	0.13	14	0.14
			AA		211	0.88	19	0.31	23	0.23	27	0.25	47	0.73	67	0.65	77	0.73	74	0.71	88	0.89	97	0.91	89	0.86	86	0.84
				G	32	0.07	52	0.43	98	0.5	115	0.53	19	0.15	37	0.18	29	0.14	33	0.16	11	0.06	10	0.05	15	0.07	18	0.09
				A	448	0.93	70	0.57	100	0.51	101	0.47	109	0.85	169	0.82	181	0.86	175	0.84	187	0.94	204	0.95	191	0.93	186	0.91
								< 0.0001		< 0.0001		< 0.0001		0.0159		< 0.0001		0.002		0.0008		_		_		0.8739		0.6485	P (G)
								2.2e-16		2.2e-16		2.2e-16		0.0062		2.162e-05		0.0034		0.0003		0.7292		0.3894		0.7444		0.337	P (A)
								1.93e-15		1.93e-15		1.93e-15		0.0101507		4.87e-05		0.00580238		0.000575362		0.598646		0.350072		0.606902		0.309881	q-value
	25	CYPOR	CC		100	0.42	39	0.64	73	0.74	89	0.82	33	0.52	45	0.44	36	0.34	39	0.38	47	0.48	49	0.46	44	0.43	43	0.42
		rs41301394	CT		125	0.52	20	0.33	26	0.26	18	0.17	29	0.45	47	0.46	56	0.53	46	0.44	44	0.44	48	0.45	47	0.46	51	0.5
			TT		15	0.06	2	0.03	0	0	1	0.01	2	0.03	11	0.11	13	0.12	19	0.18	8	0.08	10	0.09	12	0.12	8	0.08
				C	325	0.68	98	0.8	172	0.87	196	0.91	95	0.74	137	0.67	128	0.61	124	0.6	138	0.7	146	0.68	135	0.66	137	0.67
				T	155	0.32	24	0.2	26	0.13	20	0.09	33	0.26	69	0.34	82	0.39	84	0.4	60	0.3	68	0.32	71	0.35	67	0.33
								0.0077		< 0.0001		< 0.0001		0.2908		0.2817		0.11		0.0027		0.4249		0.3583		0.1932		0.8459	P (G)
								0.0075		1.164e-07		9.014e-12		0.1635		0.7901		0.0978		0.045		0.6505		0.93		0.5956		0.9289	P (A)
								0.0120826		3.61e-07		4.7e-11		0.167985		0.635821		0.116536		0.0584642		0.548099		0.70801		0.506076		0.70801	q-value
	26	CYPOR	CC		153	0.64	55	0.9	83	0.84	91	0.84	44	0.69	96	0.93	101	0.96	93	0.89	46	0.47	53	0.5	59	0.57	50	0.49
		rs10239977	CT		75	0.31	5	0.08	16	0.16	17	0.16	20	0.31	7	0.07	4	0.04	11	0.11	45	0.46	48	0.45	39	0.38	41	0.4
			TT		12	0.05	1	0.02	0	0	0	0	0	0	0	0	0	0	0	0	8	0.08	6	0.06	5	0.05	11	0.11
				C	381	0.97	115	0.94	182	0.92	199	0.92	108	0.84	199	0.97	206	0.98	197	0.95	137	0.69	154	0.72	157	0.76	141	0.69
				T	99	0.21	7	0.06	16	0.08	17	0.08	20	0.16	7	0.03	4	0.02	11	0.05	61	0.31	60	0.28	49	0.24	63	0.31
								0.0004		0.0006		0.0002		0.1831		< 0.0001		< 0.0001		< 0.0001		0.013		0.04		0.4869		0.0199	P (G)
								4.884e-05		4.338e-05		1.509e-05		0.2588		3.524e-10		9.605e-13		1.064e-07		0.0054		0.0397		0.3634		0.0044	P (A)
								0.000101726		9.11e-05		3.39e-05		0.254226		1.57e-09		6.67e-12		3.36e-07		0.00898706		0.0525964		0.331133		0.00738381	q-value
	27	CYPOR	CC		226	0.95	61	1	99	1	108	1	64	1	103	1	105	1	104	1	99	1	107	1	102	0.99	101	0.99
		rs533975609	CT		11	0.05	0	0	0	0	0	0	0	0	0	0	0	0	0	0	0	0	0	0	1	0.01	1	0.01
			TT		0	0	0	0	0	0	0	0	0	0	0	0	0	0	0	0	0	0	0	0	0	0	0	0
				C	463	0.98	122	1	198	1	216	1	128	1	206	1	210	1	208	1	198	1	214	1	205	1	203	1
				T	11	0.02	0	0	0	0	0	0	0	0	0	0	0	0	0	0	0	0	0	0	1	0.01	1	0.01
								_		_		_		_		_		_		_		_		_		_		_	P (G)
								0.132		0.0395		0.0209		0.1322		0.0401		0.0218		0.0221		0.0395		0.0212		0.1192		0.12	P (A)
								0.140857		0.0525964		0.0311761		0.140857		0.0527791		0.0320439		0.0322495		0.0525964		0.0313911		0.130567		0.130623	q-value
	28	CYPOR	GG		231	0.97	61	1	99	1	108	1	64	1	103	1	104	0.99	101	0.97	99	1	107	1	88	0.85	96	0.94
		rs72554000	AG		8	0.03	0	0	0	0	0	0	0	0	0	0	1	0.01	3	0.03	0	0	0	0	14	0.14	5	0.05
			AA		0	0	0	0	0	0	0	0	0	0	0	0	0	0	0	0	0	0	0	0	1	0.01	1	0.01
				G	470	0.98	122	1	198	1	216	1	128	1	206	1	209	1	205	0.99	198	1	214	1	190	0.92	197	0.97
				A	8	0.02	0	0	0	0	0	0	0	0	0	0	1	0.01	3	0.01	0	0	0	0	16	0.08	7	0.03
								_		_		_		_		_		_		_		_		_		_		_	P (G)
								0.3697		0.113		0.063		0.2139		0.1137		0.2889		1		0.113		0.0637		0.0002		0.1613	P (A)
								0.333852		0.127244		0.0786975		0.216758		0.127244		0.281052		0.724377		0.127244		0.0786975		0.000394856		0.167433	q-value
	Ancestor allele in bold; n no. of samples and alleles; Fr. frequency; P (A): P value of χ 2 test between alleles; P (G): P value of χ 2 test between genotypes; p-Values were calculated using Chi-square or Fisher Exact tests. q-value: adjusted p-value for multiple testing. Bold values are signiﬁcant at P < 0.05 level; PAK: Pakistani,Pakistan; ASW: African ancestry in Southwest USA; LWK: Luhya in W…

## Sheet: Table S4
	Table S4. Genotype and Allele (%) frequency distributions of CYP2C9, CYP2D6and CYPOR SNPs in indigenous Pakistani populations.
	#	Gene (SNP)	Geno-type	Allele	KPK		PUN		SIN		BAL		GLB		AZK		Total		p-value
					n	%Fr.	n	%Fr.	n	%Fr.	n	%Fr.	n	%Fr.	n	%Fr.	n	%Fr.	(HWE)
	1	CYP2C9 (rs72558189)	GG		80	94.12	75	93.75	26	92.86	12	92.31	19	100	17	94.44	229	94.24	0
			AG		1	1.18	4	5	2	7.14	1	7.69	0	0	0	0	8	3.29
			AA		4	4.7	1	1.25	0	0	0	0	0	0	1	5.56	6	2.47
				G	161	94.71	154	92.25	54	96.43	25	96.15	38	100	34	94.44	466	95.88
				A	9	5.29	6	3.75	2	3.57	1	3.85	0	0	2	2.56	20	4.12
	2	CYP2C9 (rs1057910)	AA		70	83.33	66	82.5	23	82.14	11	84.62	17	85	15	83.33	202	83.13	0.1434
			AC		11	13.1	13	16.25	5	17.86	2	15.38	3	15	3	16.67	37	15.22
			CC		3	3.57	1	1.25	0	0	0	0	0	0	0	0	4	1.65
				A	151	89.88	145	90.63	51	91.07	24	92.31	37	92.5	33	91.67	441	90.74
				C	17	10.12	15	9.37	5	8.93	2	7.69	3	7.5	3	8.33	45	9.26
	3	CYP2C9 (rs1799853)	CC		82	98.8	77	96.25	28	100	13	100	18	100	17	94.44	235	97.92	0.8705
			CT		1	1.2	3	3.75	0	0	0	0	0	0	1	5.56	5	2.08
			TT		0	0	0	0	0	0	0	0	0	0	0	0	0	0
				C	165	99.4	157	98.13	56	100	26	100	36	100	35	97.22	475	98.96
				T	1	0.6	3	1.88	0	0	0	0	0	0	1	2.78	5	1.04
	4	CYP2D6 (rs1135840)	CC		35	42.68	21	26.25	5	18.52	5	38.46	0	0	6	33.33	72	30	0
			GC		46	56.1	59	73.75	22	81.48	8	61.54	20	100	12	66.67	167	69.58
			GG		1	1.22	0	0	0	0	0	0	0	0	0	0	1	0.42
				C	116	70.73	101	63.13	32	59.26	18	69.22	20	50	24	66.67	311	64.79
				G	48	29.27	59	36.88	22	0.4074	8	30.77	20	50	12	33.33	169	35.21
	5	CYP2D6 (rs16947)	GG		39	46.99	31	38.75	14	50	3	23.08	0	0	3	16.67	90	37.35	0.5628
			AG		31	37.35	41	51.25	10	35.71	6	46.15	19	100	11	61.11	118	48.96
			AA		13	15.66	8	10	4	14.29	4	30.77	0	0	4	22.22	33	13.69
				G	109	65.66	103	64.38	38	68.86	12	46.15	19	50	17	47.22	298	61.83
				A	57	34.34	57	35.63	18	32.14	14	53.85	19	50	19	52.78	184	38.17
	6	CYP2D6 (rs566383351)	AA		0	0	0	0	0	0	0	0	0	0	0	0	0	0	0.0106
			AG		22	26.83	25	31.25	7	25.93	3	23.08	7	35	4	22.22	68	28.33
			GG		60	73.17	55	68.75	20	74.07	10	76.92	13	65	14	77.78	172	71.67
				A	22	13.41	25	15.63	7	12.96	3	11.54	7	17.5	4	11.11	68	14.59
				G	142	86.59	135	84.38	47	87.04	23	88.46	33	82.5	32	88.89	412	85.41
	7	CYP2D6 (rs374672076)	CC		0	0	0	0	0	0	0	0	0	0	0	0	0	0	0.0245
			CG		23	27.38	11	13.75	9	32.14	7	53.85	3	15.79	8	47.06	61	25.31
			GG		61	72.62	69	86.25	19	67.86	6	46.15	16	84.21	9	52.94	180	74.69
				C	23	13.69	11	6.87	9	16.07	7	26.92	3	7.89	8	23.53	61	12.7
				G	145	86.31	149	93.13	47	83.93	19	73.08	35	92.11	26	76.47	421	87.3
	8	CYP2D6 (rs530422334)	TT		80	95.24	78	97.5	27	96.43	13	100	18	100	17	94.44	233	96.68	0
			CT		2	2.38	2	2.5	1	3.57	0	0	0	0	1	5.56	6	2.49
			CC		2	2.38	0	0	0	0	0	0	0	0	0	0	2	0.83
				T	162	96.43	158	98.75	55	98.21	26	100	36	100	35	97.22	472	97.93
				C	6	3.57	2	1.25	1	1.79	0	0	0	0	1	2.78	10	2.07
	9	CYP2D6 (rs17002852)	TT		80	96.39	77	96.25	26	96.3	11	84.62	18	94.74	17	94.44	229	95.42	0
			CT		2	2.41	2	2.5	1	3.7	2	15.38	1	5.26	1	5.56	9	3.75
			CC		1	1.2	1	1.25	0	0	0	0	0	0	0	0	2	0.83
				T	162	97.59	156	97.5	53	98.15	24	92.31	37	97.37	35	97.22	467	97.29
				C	4	2.41	4	2.5	1	1.85	2	7.69	1	2.63	1	2.78	13	2.71
	10	CYP2D6 (rs34167214 )	GG		0	0	0	0	0	0	0	0	0	0	0	0	0	0	0
			GT		84	100	80	100	28	100	13	100	20	100	18	100	243	100
			TT		0	0	0	0	0	0	0	0	0	0	0	0	0	0
				T	84	50	80	50	28	50	13	50	20	50	18	50	243	50
				G	84	50	80	50	28	50	13	50	20	50	18	50	243	50
	11	CYP2D6 (rs35046171)	CC		72	86.75	77	97.47	15	53.57	12	92.31	15	83.33	16	88.89	207	86.61	0
			CT		0	0	0	0	0	0	0	0	0	0	0	0	0	0
			TT		11	13.25	2	2.53	13	46.43	1	7.69	3	16.67	2	11.11	32	13.39
				C	144	86.75	154	97.47	30	53.57	24	92.31	30	83.33	32	88.89	414	86.61
				T	22	13.25	4	2.53	26	46.43	2	7.69	6	16.67	4	11.11	64	13.39
	12	CYP2D6 (rs35023634)	GG		0	0	0	0	0	0	0	0	0	0	0	0	0	0	0
			CG		1	1.19	0	0	0	0	0	0	0	0	1	5.56	2	0.82
			CC		83	98.81	80	100	28	100	13	100	20	100	17	94.44	241	99.18
				G	84	50	80	50	28	50	13	50	20	50	18	50	243	0.14
				C	84	50	80	50	28	50	13	50	20	50	18	50	243	99.59
	13	CYP2D6 (rs35481113 )	GG		0	0	0	0	0	0	0	0	0	0	0	0	0	0	0.7929
			AG		4	4.76	2	2.53	0	0	0	0	1	5.26	1	5.56	8	3.33
			AA		80	95.24	77	97.47	27	100	13	100	18	94.74	17	94.44	232	96.67
				G	4	2.38	2	1.27	0	0	0	0	1	2.63	1	2.78	8	1.66
				A	164	97.62	156	98.73	54	100	26	100	37	97.37	35	97.22	472	98.34
	14	CYP2D6 ( rs543939200)	GG		84	100	80	100	28	100	12	100	20	100	18	100	242	100	0.7929
			AG		0	0	0	0	0	0	0	0	0	0	0	0	0	0
			AA		0	0	0	0	0	0	0	0	0	0	0	0	0	0
				G	168	100	160	100	56	100	24	100	40	100	36	100	484	100
				A	0	0	0	0	0	0	0	0	0	0	0	0	0	0
	15	CYP2D6 (rs372204775 )	CC		76	92.68	69	87.34	20	71.43	10	76.92	16	84.21	17	94.44	208	87.03	0
			CT		3	3.66	5	6.33	6	21.43	1	7.69	3	15.79	1	5.56	19	7.95
			TT		3	3.66	5	6.33	2	7.14	2	15.39	0	0	0	0	12	5.02
				C	155	94.51	143	90.51	46	82.14	21	80.77	35	92.11	35	97.22	435	91
				T	9	5.49	15	9.49	10	17.86	5	19.23	3	7.89	1	2.78	43	9
	16	CYP2D6 (rs267608272 )	TT		84	100	80	100	28	100	13	100	20	100	18	100	243	100	0
			CT		0	0	0	0	0	0	0	0	0	0	0	0	0	0
			CC		0	0	0	0	0	0	0	0	0	0	0	0	0	0
				T	168	100	160	100	56	100	26	100	40	100	36	100	486	100
				C	0	0	0	0	0	0	0	0	0	0	0	0	0	0
	17	CYP2D6 (rs28371725 )	GG		62	73.81	59	75.64	17	60.72	8	61.54	12	60	9	52.94	167	69.58	0
			AG		14	16.67	13	16.67	9	32.14	4	30.77	6	30	6	35.3	52	21.67
			AA		8	9.52	6	7.69	2	7.14	1	7.69	2	10	2	11.76	21	8.75
				G	138	82.14	131	83.97	43	76.79	20	76.92	30	75	24	70.59	386	80.42
				A	30	17.86	25	16.03	13	23.21	6	23.08	10	25	10	29.41	94	19.58
	18	CYP2D6 (rs28371738 )	CC		72	85.71	68	86.08	21	75	8	61.54	17	85	9	50	195	80.85	0.7721
			CT		11	13.1	10	12.66	6	21.43	5	38.46	3	15	9	50	44	18.18
			TT		1	1.19	1	1.27	1	3.57	0	0	0	0	0	0	3	1.24
				C	155	92.26	146	92.41	48	85.71	21	80.77	37	92.5	27	75	434	89.67
				T	13	7.74	12	7.59	8	14.29	5	19.23	3	7.5	9	25	50	10.33
	19	CYPOR (rs1057868)	CC		35	41.67	34	42.5	11	39.29	5	38.46	12	60	8	44.44	105	43.21	0.0966
			CT		41	48.81	39	48.75	14	50	7	53.85	8	4	9	50	118	48.56
			TT		8	9.52	7	8.75	3	10.71	1	7.69	0	0	1	5.56	20	8.23
				C	111	66.07	107	66.88	36	64.29	17	65.38	32	80	25	69.44	328	67.49
				T	57	33.93	53	33.13	20	35.71	9	34.62	8	20	11	30.56	158	32.51
	20	CYPOR (rs781919285)	AA		82	98.8	78	100	27	100	13	100	18	94.74	20	100	238	99.17	0.9483
			AG		1	1.2	0	0	0	0	0	0	1	5.26	0	0	2	0.83
			GG		0	0	0	0	0	0	0	0	0	0	0	0	0	0
				A	165	99.4	156	100	54	100	26	100	37	97.37	40	100	478	99.58
				G	1	0.6	0	0	0	0	0	0	1	2.63	0	0	2	0.42
		CYPOR (rs562750402)	CC		81	97.59	79	98.75	28	100	13	100	20	100	18	100	239	98.76	0.9227
	21		CT		2	2.41	1	1.25	0	0	0	0	0	0	0	0	3	1.24
			TT		0	0	0	0	0	0	0	0	0	0	0	0	0	0
				C	164	98.8	159	99.375	56	100	26	100	40	100	36	100	481	99.38
				T	2	1.2	1	0.625	0	0	0	0	0	0	0	0	3	0.62
	22	CYPOR (rs1057870)	GG		38	45.79	39	48.75	11	39.29	8	61.54	12	60	8	44.44	116	47.93	0.0155
			AG		40	48.19	38	47.5	15	53.57	4	30.77	8	40	9	50	114	47.11
			AA		5	6.02	3	3.75	2	7.14	1	7.69	0	0	1	5.56	12	4.96
				G	116	69.88	116	72.5	37	66.07	20	76.92	32	80	25	69.44	346	71.49
				A	50	30.12	44	27.5	19	33.93	6	23.08	8	20	11	30.56	138	28.51
	23	CYPOR (rs4732514)	CC		16	19.28	14	17.72	5	17.86	3	23.08	4	21.05	6	33.33	48	20	0.2651
			CT		36	43.37	34	43.04	14	50	7	53.84	11	57.9	7	38.89	109	45.42
			TT		31	37.35	31	39.24	9	32.14	3	23.08	4	21.05	5	27.78	83	34.58
				C	68	40.96	62	39.24	24	42.86	13	50	19	50	19	52.78	205	42.71
				T	98	59.04	96	60.76	32	57.14	13	50	19	50	17	47.22	275	57.29
	24	CYPOR (rs4732515)	CC		75	90.36	70	88.61	25	92.6	10	76.92	15	83.33	15	88.2	210	88.61	0.2082
			CT		8	9.64	9	11.39	1	3.7	3	23.08	3	16.67	1	5.9	25	10.55
			TT		0	0	0	0	1	3.7	0	0	0	0	1	5.9	2	0.84
				C	158	95.18	149	94.3	51	94.44	23	88.46	33	91.67	31	91.18	445	93.88
				T	8	4.82	9	5.7	3	5.56	3	11.54	3	8.33	3	8.82	29	6.12
	25	CYPOR (rs4732516)	CC		1	1.19	0	0	1	3.57	0	0	4	21.05	0	0	6	2.48	0
			CG		6	7.14	7	8.75	1	3.57	1	7.69	0	0	2	11.11	17	7.02
			GG		77	91.67	73	91.25	26	92.86	12	92.31	15	78.95	16	88.89	219	90.5
				C	8	4.76	7	4.37	3	5.36	1	3.85	8	21.05	2	5.56	29	5.99
				G	160	95.24	153	95.63	53	94.64	25	96.15	30	78.95	34	94.44	455	94.01
	26	CYPOR(rs71526806)	CT		70	83.33	65	81.25	23	82.14	11	84.62	15	78.95	15	83.33	199	82.23	0.5429
			CTGT		13	15.48	14	17.5	5	17.86	2	15.38	4	21.05	2	11.11	40	16.53
			GT		1	1.19	1	1.25	0	0	0	0	0	0	1	5.56	3	1.24
				CT	153	91.07	144	90	51	91.07	24	92.31	34	89.47	32	88.89	438	90.5
				GT	15	8.93	16	10	5	8.93	2	7.69	4	10.53	4	11.11	46	9.5
	27	CYPOR (rs2228104)	CC		74	88.1	70	88.61	24	85.71	11	84.62	16	80	16	88.9	211	87.19	0.0755
			CT		9	10.71	8	10.13	4	14.29	1	7.69	4	20	2	11.1	28	11.57
			TT		1	1.19	1	1.27	0	0	1	7.69	0	0	0	0	3	1.24
				C	157	93.45	148	93.67	52	92.86	23	88.46	36	90	34	94.44	450	92.98
				T	11	6.55	10	6.33	4	7.14	3	11.54	4	10	2	5.56	34	7.02
	28	CYPOR (rs2302433)	CC		79	95.18	77	96.25	28	100	13	100	19	100	17	94.44	233	96.68	0.7933
			CT		4	4.82	3	3.75	0	0	0	0	0	0	1	5.56	8	3.32
			TT		0	0	0	0	0	0	0	0	0	0	0	0	0	0
				C	162	97.6	157	98.12	56	100	26	100	38	100	35	97.22	474	98.34
				T	4	2.4	3	1.88	0	0	0	0	0	0	1	2.78	8	1.66
	29	CYPOR (rs369026313)	CC		82	100	80	100	27	100	13	100	18	100	18	100	238	100	0.7933
			CT		0	0	0	0	0	0	0	0	0	0	0	0	0	0
			TT		0	0	0	0	0	0	0	0	0	0	0	0	0	0
				C	164	100	160	100	54	100	26	100	36	100	36	100	476	100
				T	0	0	0	0	0	0	0	0	0	0	0	0	0	0
	30	CYPOR (rs1135612)	AA		52	62.65	50	62.5	18	64.29	8	61.54	15	78.95	11	61.11	154	63.9	0
			GA		22	26.51	21	26.25	7	25	4	30.77	4	21.05	5	27.78	63	26.14
			GG		9	10.48	9	11.25	3	10.71	1	7.69	0	0	2	11.11	24	9.96
				A	126	75.9	121	75.62	43	76.79	20	76.9	34	89.47	27	75	371	76.97
				G	40	24.1	39	24.38	13	23.21	6	23.1	4	10.53	9	25	111	23.03
	31	CYPOR (rs13223707)	GG		73	86.9	69	88.46	24	85.71	12	92.31	20	100	16	88.88	214	88.8	0.0226
			CG		10	11.91	8	10.26	4	14.29	1	7.69	0	0	1	5.56	24	9.96
			CC		1	1.19	1	1.28	0	0	0	0	0	0	1	5.56	3	1.24
				G	156	92.86	146	93.59	52	92.86	25	96.15	40	100	33	91.67	452	93.78
				C	12	7.14	10	6.41	4	7.14	1	3.85	0	0	3	8.33	30	6.22
	32	CYPOR (rs13240147)	GG		1	1.2	1	1.25	0	0	0	0	0	0	1	5.56	3	1.25	0.0449
			GA		9	10.85	7	8.75	3	11.11	1	8.33	4	20	2	11.11	26	10.83
			AA		73	87.95	72	90	24	88.89	11	91.67	16	80	15	83.33	211	87.92
				G	11	6.63	9	5.63	3	5.56	1	4.17	4	10	4	11.11	448	6.67
				A	155	93.37	151	94.37	51	94.44	23	95.83	36	90	32	88.89	32	93.33
	33	CYPOR (rs41301394)	CC		36	42.86	30	37.97	14	50	5	38.46	7	38.89	8	44.44	100	41.67	0.0031
			CT		43	51.19	45	56.96	14	50	7	53.85	8	44.44	8	44.44	125	52.08
			TT		5	5.95	4	5.07	0	0	1	7.69	3	16.67	2	11.12	15	6.25
				C	115	68.45	105	66.46	42	75	17	65.38	22	61.11	24	66.67	325	67.71
				T	53	31.55	53	33.54	14	25	9	34.62	14	38.89	12	33.33	155	32.29
	34	CYPOR (rs10239977)	CC		50	60.98	55	68.75	17	60.71	8	61.54	12	63.16	11	61.11	153	63.75	0.4802
			CT		28	34.15	20	25	10	35.72	5	38.46	7	36.84	5	27.78	75	31.25
			TT		4	4.87	5	6.25	1	3.57	0	0	0	0	2	11.11	12	5
				C	128	78.05	130	81.25	44	78.57	21	80.77	31	81.58	27	75	381	79.38
				T	36	21.95	30	18.75	12	21.43	5	19.23	7	18.42	9	25	99	20.63
	35	CYPOR (rs533975609)	CC		80	97.56	75	94.94	25	89.29	12	92.31	18	100	16	94.12	226	95.36	0.5203
			CT		2	2.44	4	5.06	3	10.71	1	7.69	0	0	1	5.88	11	4.64
			TT		0	0	0	0	0	0	0	0	0	0	0	0	0	0
				C	159	96.95	149	94.3	53	94.64	25	96.15	36	100	33	97.06	455	97.68
				T	5	3.05	9	5.7	3	5.36	1	3.85	0	0	1	2.94	19	2.32
	36		GG		80	96.39	76	96.2	26	96.3	13	100	19	100	17	94.44	231	96.65	0.7924
		CYPOR (rs72554000)	AG		3	3.61	3	3.8	1	3.7	0	0	0	0	1	5.56	8	3.35
			AA		0	0	0	0	0	0	0	0	0	0	0	0	0	0
				G	163	98.19	155	98.1	53	98.15	26	100	38	100	35	97.22	470	98.33
				A	3	1.81	3	1.9	1	1.85	0	0	0	0	1	2.78	8	1.67
	Khyber Pakhtunkhwa (KPK); Punjab (PUN); Sindh (SIN), Balochistan (BAL); Gilgit-Baltistan (GLB); Azad Kashmir (AZK); Bold Ancestral Allele; Percent frequency % Fr.; Genotype and Allele counts n; Hardy-Weinberg Equilibrium HWE; Ancestral Allele presented in bold. Differences significant at P<0.05.
